# Supplementary material
Source: MDPI journal article supplement (https://www.mdpi.com/2076-3417/14/4/1552)
Supplement: s1 [file s1]

# Shenzhen Metro Line 14:

## #Original Timetable

```
timetable = np.matrix([[111, 121, 131, 141, 151, 161, 171, 181, 191, 1101, 1111, 1121, 1131,
1141, 1151, 1161, 1171, 1172, 1162, 1152, 1142, 1132, 1122, 1112, 1102, 192, 182, 172, 162, 152,
142, 132, 122, 112,
211, 221, 231, 241, 251, 261, 271, 281, 291, 2101, 2111, 2121, 2131, 2141,
2151, 2161, 2171, 2172, 2162, 2152, 2142, 2132, 2122, 2112, 2102, 292, 282, 272, 262, 252, 242,
232, 222, 212,
311, 321, 331, 341, 351, 361, 371, 381, 391, 3101, 3111, 3121, 3131, 3141,
3151, 3161, 3171, 3172, 3162, 3152, 3142, 3132, 3122, 3112, 3102, 392, 382, 372, 362, 352, 342,
332, 322, 312,
411, 421, 431, 441, 451, 461, 471, 481, 491, 4101, 4111, 4121, 4131, 4141,
4151, 4161, 4171, 4172, 4162, 4152, 4142, 4132, 4122, 4112, 4102, 492, 482, 472, 462, 452, 442,
432, 422, 412,
511, 521, 531, 541, 551, 561, 571, 581, 591, 5101, 5111, 5121, 5131, 5141,
5151, 5161, 5171, 5172, 5162, 5152, 5142, 5132, 5122, 5112, 5102, 592, 582, 572, 562, 552, 542,
532, 522, 512,
611, 621, 631, 641, 651, 661, 671, 681, 691, 6101, 6111, 6121, 6131, 6141,
6151, 6161, 6171, 6172, 6162, 6152, 6142, 6132, 6122, 6112, 6102, 692, 682, 672, 662, 652, 642,
632, 622, 612,
711, 721, 731, 741, 751, 761, 771, 781, 791, 7101, 7111, 7121, 7131, 7141,
7151, 7161, 7171, 7172, 7162, 7152, 7142, 7132, 7122, 7112, 7102, 792, 782, 772, 762, 752, 742,
732, 722, 712,
811, 821, 831, 841, 851, 861, 871, 881, 891, 8101, 8111, 8121, 8131, 8141,
8151, 8161, 8171, 8172, 8162, 8152, 8142, 8132, 8122, 8112, 8102, 892, 882, 872, 862, 852, 842,
832, 822, 812,
911, 921, 931, 941, 951, 961, 971, 981, 991, 9101, 9111, 9121, 9131, 9141,
9151, 9161, 9171, 9172, 9162, 9152, 9142, 9132, 9122, 9112, 9102, 992, 982, 972, 962, 952, 942,
932, 922, 912,
1011, 1021, 1031, 1041, 1051, 1061, 1071, 1081, 1091, 10101, 10111,
10121, 10131, 10141, 10151, 10161, 10171, 10172, 10162, 10152, 10142, 10132, 10122, 10112,
10102, 1092, 1082, 1072, 1062, 1052, 1042, 1032, 1022, 1012,
1111, 1121, 1131, 1141, 1151, 1161, 1171, 1181, 1191, 11101, 11111,
11121, 11131, 11141, 11151, 11161, 11171, 11172, 11162, 11152, 11142, 11132, 11122, 11112,
11102, 1192, 1182, 1172, 1162, 1152, 1142, 1132, 1122, 1112,
1211, 1221, 1231, 1241, 1251, 1261, 1271, 1281, 1291, 12101, 12111,
12121, 12131, 12141, 12151, 12161, 12171, 12172, 12162, 12152, 12142, 12132, 12122, 12112,
12102, 1292, 1282, 1272, 1262, 1252, 1242, 1232, 1222, 1212,
1311, 1321, 1331, 1341, 1351, 1361, 1371, 1381, 1391, 13101, 13111,
```

13121, 13131, 13141, 13151, 13161, 13171, 13172, 13162, 13152, 13142, 13132, 13122, 13112, 13102, 1392, 1382, 1372, 1362, 1352, 1342, 1332, 1322, 1312,

1411, 1421, 1431, 1441, 1451, 1461, 1471, 1481, 1491, 14101, 14111, 14121, 14131, 14141, 14151, 14161, 14171, 14172, 14162, 14152, 14142, 14132, 14122, 14112, 14102, 1492, 1482, 1472, 1462, 1452, 1442, 1432, 1422, 1412,

1511, 1521, 1531, 1541, 1551, 1561, 1571, 1581, 1591, 15101, 15111, 15121, 15131, 15141, 15151, 15161, 15171, 15172, 15162, 15152, 15142, 15132, 15122, 15112, 15102, 1592, 1582, 1572, 1562, 1552, 1542, 1532, 1522, 1512,

1611, 1621, 1631, 1641, 1651, 1661, 1671, 1681, 1691, 16101, 16111, 16121, 16131, 16141, 16151, 16161, 16171, 16172, 16162,

16152, 16142, 16132, 16122, 16112, 16102, 1692, 1682, 1672, 1662, 1652, 1642, 1632, 1622, 1612],

[25021, 25216, 25446, 25617, 25817, 26050, 26182, 26367, 26530, 26831, 26965, 27169, 27285, 27391, 27494, 27733, 27909, 27997, 28173, 28407, 28512, 28617, 28738, 28942, 29078, 29357, 29522, 29704, 29835, 30075, 30278, 30437, 30672, 30858,

25278, 25473, 25703, 25874, 26074, 26307, 26439, 26624, 26787, 27088, 27222, 27426, 27542, 27648, 27751, 27990, 28166, 28254, 28430, 28664, 28769, 28874, 28995, 29199, 29335, 29614, 29779, 29961, 30092, 30332, 30535, 30694, 30929, 31115,

25535, 25730, 25960, 26131, 26331, 26564, 26696, 26881, 27044, 27345, 27479, 27683, 27799, 27905, 28008, 28247, 28423, 28511, 28687, 28921, 29026, 29131, 29252, 29456, 29592, 29871, 30036, 30218, 30349, 30589, 30792, 30951, 31186, 31372,

25792, 25987, 26217, 26388, 26588, 26821, 26953, 27138, 27301, 27602, 27736, 27940, 28056, 28162, 28265, 28504, 28680, 28768, 28944, 29178, 29283, 29388, 29509, 29713, 29849, 30128, 30293, 30475, 30606, 30846, 31049, 31208, 31443, 31629,

26049, 26244, 26474, 26645, 26845, 27078, 27210, 27395, 27558, 27859, 27993, 28197, 28313, 28419, 28522, 28761, 28937, 29025, 29201, 29435, 29540, 29645, 29766, 29970, 30106, 30385, 30550, 30732, 30863, 31103, 31306, 31465, 31700, 31886,

26306, 26501, 26731, 26902, 27102, 27335, 27467, 27652, 27815, 28116, 28250, 28454, 28570, 28676, 28779, 29018, 29194, 29282, 29458, 29692, 29797, 29902, 30023, 30227, 30363, 30642, 30807, 30989, 31120, 31360, 31563, 31722, 31957, 32143,

26563, 26758, 26988, 27159, 27359, 27592, 27724, 27909, 28072, 28373, 28507, 28711, 28827, 28933, 29036, 29275, 29451, 29539, 29715, 29949, 30054, 30159, 30280, 30484, 30620, 30899, 31064, 31246, 31377, 31617, 31820, 31979, 32214, 32400,

26820, 27015, 27245, 27416, 27616, 27849, 27981, 28166, 28329, 28630, 28764, 28968, 29084, 29190, 29293, 29532, 29708, 29796, 29972, 30206, 30311, 30416, 30537, 30741, 30877, 31156, 31321, 31503, 31634, 31874, 32077, 32236, 32471, 32657,

27077, 27272, 27502, 27673, 27873, 28106, 28238, 28423, 28586, 28887, 29021, 29225, 29341, 29447, 29550, 29789, 29965, 30053, 30229, 30463, 30568, 30673, 30794, 30998, 31134, 31413, 31578, 31760, 31891, 32131, 32334, 32493, 32728, 32914,

27334, 27529, 27759, 27930, 28130, 28363, 28495, 28680, 28843, 29144, 29278, 29482, 29598, 29704, 29807, 30046, 30222, 30310, 30486, 30720, 30825, 30930, 31051, 31255, 31391, 31670, 31835, 32017, 32148, 32388, 32591, 32750, 32985, 33171,

27591, 27786, 28016, 28187, 28387, 28620, 28752, 28937, 29100, 29401,

29535, 29739, 29855, 29961, 30064, 30303, 30479, 30567, 30743, 30977, 31082, 31187, 31308, 31512, 31648, 31927, 32092, 32274, 32405, 32645, 32848, 33007, 33242, 33428,  
27848, 28043, 28273, 28444, 28644, 28877, 29009, 29194, 29357, 29658, 29792, 29996, 30112, 30218, 30321, 30560, 30736, 30824, 31000, 31234, 31339, 31444, 31565, 31769, 31905, 32184, 32349, 32531, 32662, 32902, 33105, 33264, 33499, 33685,  
28105, 28300, 28530, 28701, 28901, 29134, 29266, 29451, 29614, 29915, 30049, 30253, 30369, 30475, 30578, 30817, 30993, 31081, 31257, 31491, 31596, 31701, 31822, 32026, 32162, 32441, 32606, 32788, 32919, 33159, 33362, 33521, 33756, 33942,  
28362, 28557, 28787, 28958, 29158, 29391, 29523, 29708, 29871, 30172, 30306, 30510, 30626, 30732, 30835, 31074, 31250, 31338, 31514, 31748, 31853, 31958, 32079, 32283, 32419, 32698, 32863, 33045, 33176, 33416, 33619, 33778, 34013, 34199,  
28619, 28814, 29044, 29215, 29415, 29648, 29780, 29965, 30128, 30429, 30563, 30767, 30883, 30989, 31092, 31331, 31507, 31595, 31771, 32005, 32110, 32215, 32336, 32540, 32676, 32955, 33120, 33302, 33433, 33673, 33876, 34035, 34270, 34456,  
28876, 29071, 29301, 29472, 29672, 29905, 30037, 30222, 30385, 30686, 30820, 31024, 31140, 31246, 31349, 31588, 31764,  
31852, 32028, 32262, 32367, 32472, 32593, 32797, 32933, 33212, 33377, 33559, 33690, 33930, 34133, 34292, 34527, 34713],

[25066, 25251, 25486, 25652, 25847, 26080, 26212, 26397, 26570, 26861, 26995, 27199, 27320, 27426, 27529, 27763, 27939, 28027, 28203, 28442, 28547, 28652, 28768, 28972, 29108, 29397, 29552, 29734, 29865, 30105, 30313, 30477, 30707, 30903,  
25323, 25508, 25743, 25909, 26104, 26337, 26469, 26654, 26827, 27118, 27252, 27456, 27577, 27683, 27786, 28020, 28196, 28284, 28460, 28699, 28804, 28909, 29025, 29229, 29365, 29654, 29809, 29991, 30122, 30362, 30570, 30734, 30964, 31160,  
25580, 25765, 26000, 26166, 26361, 26594, 26726, 26911, 27084, 27375, 27509, 27713, 27834, 27940, 28043, 28277, 28453, 28541, 28717, 28956, 29061, 29166, 29282, 29486, 29622, 29911, 30066, 30248, 30379, 30619, 30827, 30991, 31221, 31417,  
25837, 26022, 26257, 26423, 26618, 26851, 26983, 27168, 27341, 27632, 27766, 27970, 28091, 28197, 28300, 28534, 28710, 28798, 28974, 29213, 29318, 29423, 29539, 29743, 29879, 30168, 30323, 30505, 30636, 30876, 31084, 31248, 31478, 31674,  
26094, 26279, 26514, 26680, 26875, 27108, 27240, 27425, 27598, 27889, 28023, 28227, 28348, 28454, 28557, 28791, 28967, 29055, 29231, 29470, 29575, 29680, 29796, 30000, 30136, 30425, 30580, 30762, 30893, 31133, 31341, 31505, 31735, 31931,  
26351, 26536, 26771, 26937, 27132, 27365, 27497, 27682, 27855, 28146, 28280, 28484, 28605, 28711, 28814, 29048, 29224, 29312, 29488, 29727, 29832, 29937, 30053, 30257, 30393, 30682, 30837, 31019, 31150, 31390, 31598, 31762, 31992, 32188,  
26608, 26793, 27028, 27194, 27389, 27622, 27754, 27939, 28112, 28403, 28537, 28741, 28862, 28968, 29071, 29305, 29481, 29569, 29745, 29984, 30089, 30194, 30310, 30514, 30650, 30939, 31094, 31276, 31407, 31647, 31855, 32019, 32249, 32445,  
26865, 27050, 27285, 27451, 27646, 27879, 28011, 28196, 28369, 28660, 28794, 28998, 29119, 29225, 29328, 29562, 29738, 29826, 30002, 30241, 30346, 30451, 30567, 30771, 30907, 31196, 31351, 31533, 31664, 31904, 32112, 32276, 32506, 32702,  
27122, 27307, 27542, 27708, 27903, 28136, 28268, 28453, 28626, 28917,

29051, 29255, 29376, 29482, 29585, 29819, 29995, 30083, 30259, 30498, 30603, 30708, 30824,  
31028, 31164, 31453, 31608, 31790, 31921, 32161, 32369, 32533, 32763, 32959,  
27379, 27564, 27799, 27965, 28160, 28393, 28525, 28710, 28883, 29174,  
29308, 29512, 29633, 29739, 29842, 30076, 30252, 30340, 30516, 30755, 30860, 30965, 31081,  
31285, 31421, 31710, 31865, 32047, 32178, 32418, 32626, 32790, 33020, 33216,  
27636, 27821, 28056, 28222, 28417, 28650, 28782, 28967, 29140, 29431,  
29565, 29769, 29890, 29996, 30099, 30333, 30509, 30597, 30773, 31012, 31117, 31222, 31338,  
31542, 31678, 31967, 32122, 32304, 32435, 32675, 32883, 33047, 33277, 33473,  
27893, 28078, 28313, 28479, 28674, 28907, 29039, 29224, 29397, 29688,  
29822, 30026, 30147, 30253, 30356, 30590, 30766, 30854, 31030, 31269, 31374, 31479, 31595,  
31799, 31935, 32224, 32379, 32561, 32692, 32932, 33140, 33304, 33534, 33730,  
28150, 28335, 28570, 28736, 28931, 29164, 29296, 29481, 29654, 29945,  
30079, 30283, 30404, 30510, 30613, 30847, 31023, 31111, 31287, 31526, 31631, 31736, 31852,  
32056, 32192, 32481, 32636, 32818, 32949, 33189, 33397, 33561, 33791, 33987,  
28407, 28592, 28827, 28993, 29188, 29421, 29553, 29738, 29911, 30202,  
30336, 30540, 30661, 30767, 30870, 31104, 31280, 31368, 31544, 31783, 31888, 31993, 32109,  
32313, 32449, 32738, 32893, 33075, 33206, 33446, 33654, 33818, 34048, 34244,  
28664, 28849, 29084, 29250, 29445, 29678, 29810, 29995, 30168, 30459,  
30593, 30797, 30918, 31024, 31127, 31361, 31537, 31625, 31801, 32040, 32145, 32250, 32366,  
32570, 32706, 32995, 33150, 33332, 33463, 33703, 33911, 34075, 34305, 34501,  
28921, 29106, 29341, 29507, 29702, 29935, 30067, 30252, 30425, 30716,  
30850, 31054, 31175, 31281, 31384, 31618, 31794, 31882,  
32058, 32297, 32402, 32507, 32623, 32827, 32963, 33252, 33407, 33589,  
33720, 33960, 34168, 34332, 34562, 34758]

))

# Shenzhen Metro Line 1:

## #Original Timetable

```
timetable = np.matrix([[111, 121, 131, 141, 151, 161, 171, 181, 191, 1101, 1111, 1121, 1131,
1141,
1151,
1161,1171,1181,1191,1201,1211,1221,1231,1241,1251,1261,1271,1281,1291,1301,1302,1292,1
282,1272,1262,1252,1242,1232,1222,1212,1202,1192,1182,1172, 1162, 1152, 1142, 1132, 1122,
1112, 1102, 192, 182, 172, 162, 152, 142, 132,122, 112,
211, 221, 231, 241, 251, 261, 271, 281, 291, 2101, 2111, 2121, 2131,
2141, 2151, 2161, 2171, 2181, 2191, 2201, 2211, 2221, 2231, 2241, 2251, 2261, 2271, 2281,
2291, 2301, 2302, 2292, 2282, 2272, 2262, 2252, 2242, 2232, 2222, 2212, 2202, 2192, 2182,
2172, 2162, 2152, 2142, 2132, 2122, 2112, 2102, 292, 282, 272, 262, 252, 242, 232, 222, 212,
311, 321, 331, 341, 351, 361, 371, 381, 391, 3101, 3111, 3121, 3131,
3141, 3151, 3161, 3171, 3181, 3191, 3201, 3211, 3221, 3231, 3241, 3251, 3261, 3271, 3281,
3291, 3301, 3302, 3292, 3282, 3272, 3262, 3252, 3242, 3232, 3222, 3212, 3202, 3192, 3182,
3172, 3162, 3152, 3142, 3132, 3122, 3112, 3102, 392, 382, 372, 362, 352, 342, 332, 322, 312,
411, 421, 431, 441, 451, 461, 471, 481, 491, 4101, 4111, 4121, 4131,
4141, 4151, 4161, 4171, 4181, 4191, 4201, 4211, 4221, 4231, 4241, 4251, 4261, 4271, 4281,
4291, 4301, 4302, 4292, 4282, 4272, 4262, 4252, 4242, 4232, 4222, 4212, 4202, 4192, 4182,
4172, 4162, 4152, 4142, 4132, 4122, 4112, 4102, 492, 482, 472, 462, 452, 442, 432, 422, 412,
511, 521, 531, 541, 551, 561, 571, 581, 591, 5101, 5111, 5121, 5131,
5141, 5151, 5161, 5171, 5181, 5191, 5201, 5211, 5221, 5231, 5241, 5251, 5261, 5271, 5281,
5291, 5301, 5302, 5292, 5282, 5272, 5262, 5252, 5242, 5232, 5222, 5212, 5202, 5192, 5182,
5172, 5162, 5152, 5142, 5132, 5122, 5112, 5102, 592, 582, 572, 562, 552, 542, 532, 522, 512,
611, 621, 631, 641, 651, 661, 671, 681, 691, 6101, 6111, 6121, 6131,
6141, 6151, 6161, 6171, 6181, 6191, 6201, 6211, 6221, 6231, 6241, 6251, 6261, 6271, 6281,
6291, 6301, 6302, 6292, 6282, 6272, 6262, 6252, 6242, 6232, 6222, 6212, 6202, 6192, 6182,
6172, 6162, 6152, 6142, 6132, 6122, 6112, 6102, 692, 682, 672, 662, 652, 642, 632, 622, 612,
711, 721, 731, 741, 751, 761, 771, 781, 791, 7101, 7111, 7121, 7131,
7141, 7151, 7161, 7171, 7181, 7191, 7201, 7211, 7221, 7231, 7241, 7251, 7261, 7271, 7281,
7291, 7301, 7302, 7292, 7282, 7272, 7262, 7252, 7242, 7232, 7222, 7212, 7202, 7192, 7182,
7172, 7162, 7152, 7142, 7132, 7122, 7112, 7102, 792, 782, 772, 762, 752, 742, 732, 722, 712,
811, 821, 831, 841, 851, 861, 871, 881, 891, 8101, 8111, 8121, 8131,
8141, 8151, 8161, 8171, 8181, 8191, 8201, 8211, 8221, 8231, 8241, 8251, 8261, 8271, 8281,
8291, 8301, 8302, 8292, 8282, 8272, 8262, 8252, 8242, 8232, 8222, 8212, 8202, 8192, 8182,
8172, 8162, 8152, 8142, 8132, 8122, 8112, 8102, 892, 882, 872, 862, 852, 842, 832, 822, 812,
911, 921, 931, 941, 951, 961, 971, 981, 991, 9101, 9111, 9121, 9131,
9141, 9151, 9161, 9171, 9181, 9191, 9201, 9211, 9221, 9231, 9241, 9251, 9261, 9271, 9281,
9291, 9301, 9302, 9292, 9282, 9272, 9262, 9252, 9242, 9232, 9222, 9212, 9202, 9192, 9182,
9172, 9162, 9152, 9142, 9132, 9122, 9112, 9102, 992, 982, 972, 962, 952, 942, 932, 922, 912,
1011, 1021, 1031, 1041, 1051, 1061, 1071, 1081, 1091, 10101,
```

10111, 10121, 10131, 10141, 10151, 10161, 10171, 10181, 10191, 10201, 10211, 10221, 10231, 10241, 10251, 10261, 10271, 10281, 10291, 10301, 10302, 10292, 10282, 10272, 10262, 10252, 10242, 10232, 10222, 10212, 10202, 10192, 10182, 10172, 10162, 10152, 10142, 10132, 10122, 10112, 10102, 1092, 1082, 1072, 1062, 1052, 1042, 1032, 1022, 1012,

1111, 1121, 1131, 1141, 1151, 1161, 1171, 1181, 1191, 11101, 11111, 11121, 11131, 11141, 11151, 11161, 11171, 11181, 11191, 11201, 11211, 11221, 11231, 11241, 11251, 11261, 11271, 11281, 11291, 11301, 11302, 11292, 11282, 11272, 11262, 11252, 11242, 11232, 11222, 11212, 11202, 11192, 11182, 11172, 11162, 11152, 11142, 11132, 11122, 11112, 11102, 1192, 1182, 1172, 1162, 1152, 1142, 1132, 1122, 1112,

1211, 1221, 1231, 1241, 1251, 1261, 1271, 1281, 1291, 12101, 12111, 12121, 12131, 12141, 12151, 12161, 12171, 12181, 12191, 12201, 12211, 12221, 12231, 12241, 12251, 12261, 12271, 12281, 12291, 12301, 12302, 12292, 12282, 12272, 12262, 12252, 12242, 12232, 12222, 12212, 12202, 12192, 12182, 12172, 12162, 12152, 12142, 12132, 12122, 12112, 12102, 1292, 1282, 1272, 1262, 1252, 1242, 1232, 1222, 1212,

1311, 1321, 1331, 1341, 1351, 1361, 1371, 1381, 1391, 13101, 13111, 13121, 13131, 13141, 13151, 13161, 13171, 13181, 13191, 13201, 13211, 13221, 13231, 13241, 13251, 13261, 13271, 13281, 13291, 13301, 13302, 13292, 13282, 13272, 13262, 13252, 13242, 13232, 13222, 13212, 13202, 13192, 13182, 13172, 13162, 13152, 13142, 13132, 13122, 13112, 13102, 1392, 1382, 1372, 1362, 1352, 1342, 1332, 1322, 1312,

1411, 1421, 1431, 1441, 1451, 1461, 1471, 1481, 1491, 14101, 14111, 14121, 14131, 14141, 14151, 14161, 14171, 14181, 14191, 14201, 14211, 14221, 14231, 14241, 14251, 14261, 14271, 14281, 14291, 14301, 14302, 14292, 14282, 14272, 14262, 14252, 14242, 14232, 14222, 14212, 14202, 14192, 14182, 14172, 14162, 14152, 14142, 14132, 14122, 14112, 14102, 1492, 1482, 1472, 1462, 1452, 1442, 1432, 1422, 1412,

1511, 1521, 1531, 1541, 1551, 1561, 1571, 1581, 1591, 15101, 15111, 15121, 15131, 15141, 15151, 15161, 15171, 15181, 15191, 15201, 15211, 15221, 15231, 15241, 15251, 15261, 15271, 15281, 15291, 15301, 15302, 15292, 15282, 15272, 15262, 15252, 15242, 15232, 15222, 15212, 15202, 15192, 15182, 15172, 15162, 15152, 15142, 15132, 15122, 15112, 15102, 1592, 1582, 1572, 1562, 1552, 1542, 1532, 1522, 1512,

1611, 1621, 1631, 1641, 1651, 1661, 1671, 1681, 1691, 16101, 16111, 16121, 16131, 16141, 16151, 16161, 16171, 16181, 16191, 16201, 16211, 16221, 16231, 16241, 16251, 16261, 16271, 16281, 16291, 16301, 16302, 16292, 16282, 16272, 16262, 16252, 16242, 16232, 16222, 16212, 16202, 16192, 16182, 16172, 16162, 16152, 16142, 16132, 16122, 16112, 16102, 1692, 1682, 1672, 1662, 1652, 1642, 1632, 1622, 1612],

[25165,25356,25601,25840,25964,26103,26215,26336,26478,26591,26717,26840,27051,27170, 27300,27403,27528,27642,27794,27914,28043,28202,28297,28400,28585,28707,28844,28964,2 9072,29167,29227,29375,29481,29607,29744,29856,30039,30138,30240,30400,30526,30652,30 802,30917,31043,31155,31289,31409,31630,31753,31884,31997,32134,32255,32367,32511,326 30,32874,33119,33310

,25505, 25696, 25941, 26180, 26304, 26443, 26555, 26676, 26818, 26931, 27057, 27180, 27391, 27510, 27640, 27743, 27868, 27982, 28134, 28254, 28383, 28542, 28637, 28740, 28925, 29047, 29184, 29304, 29412, 29507, 29567, 29715, 29821, 29947, 30084, 30196, 30379, 30478, 30580, 30740, 30866, 30992, 31142, 31257, 31383, 31495, 31629, 31749, 31970, 32093, 32224, 32337,

32474, 32595, 32707, 32851, 32970, 33214, 33459, 33650  
,25845, 26036, 26281, 26520, 26644, 26783, 26895, 27016, 27158, 27271, 27397, 27520, 27731,  
27850, 27980, 28083, 28208, 28322, 28474, 28594, 28723, 28882, 28977, 29080, 29265, 29387,  
29524, 29644, 29752, 29847, 29907, 30055, 30161, 30287, 30424, 30536, 30719, 30818, 30920,  
31080, 31206, 31332, 31482, 31597, 31723, 31835, 31969, 32089, 32310, 32433, 32564, 32677,  
32814, 32935, 33047, 33191, 33310, 33554, 33799, 33990  
,26185, 26376, 26621, 26860, 26984, 27123, 27235, 27356, 27498, 27611, 27737, 27860, 28071,  
28190, 28320, 28423, 28548, 28662, 28814, 28934, 29063, 29222, 29317, 29420, 29605, 29727,  
29864, 29984, 30092, 30187, 30247, 30395, 30501, 30627, 30764, 30876, 31059, 31158, 31260,  
31420, 31546, 31672, 31822, 31937, 32063, 32175, 32309, 32429, 32650, 32773, 32904, 33017,  
33154, 33275, 33387, 33531, 33650, 33894, 34139, 34330  
,26525, 26716, 26961, 27200, 27324, 27463, 27575, 27696, 27838, 27951, 28077, 28200, 28411,  
28530, 28660, 28763, 28888, 29002, 29154, 29274, 29403, 29562, 29657, 29760, 29945, 30067,  
30204, 30324, 30432, 30527, 30587, 30735, 30841, 30967, 31104, 31216, 31399, 31498, 31600,  
31760, 31886, 32012, 32162, 32277, 32403, 32515, 32649, 32769, 32990, 33113, 33244, 33357,  
33494, 33615, 33727, 33871, 33990, 34234, 34479, 34670  
,26865, 27056, 27301, 27540, 27664, 27803, 27915, 28036, 28178, 28291, 28417, 28540, 28751,  
28870, 29000, 29103, 29228, 29342, 29494, 29614, 29743, 29902, 29997, 30100, 30285, 30407,  
30544, 30664, 30772, 30867, 30927, 31075, 31181, 31307, 31444, 31556, 31739, 31838, 31940,  
32100, 32226, 32352, 32502, 32617, 32743, 32855, 32989, 33109, 33330, 33453, 33584, 33697,  
33834, 33955, 34067, 34211, 34330, 34574, 34819, 35010  
,27205, 27396, 27641, 27880, 28004, 28143, 28255, 28376, 28518, 28631, 28757, 28880, 29091,  
29210, 29340, 29443, 29568, 29682, 29834, 29954, 30083, 30242, 30337, 30440, 30625, 30747,  
30884, 31004, 31112, 31207, 31267, 31415, 31521, 31647, 31784, 31896, 32079, 32178, 32280,  
32440, 32566, 32692, 32842, 32957, 33083, 33195, 33329, 33449, 33670, 33793, 33924, 34037,  
34174, 34295, 34407, 34551, 34670, 34914, 35159, 35350  
,27545, 27736, 27981, 28220, 28344, 28483, 28595, 28716, 28858, 28971, 29097, 29220, 29431,  
29550, 29680, 29783, 29908, 30022, 30174, 30294, 30423, 30582, 30677, 30780, 30965, 31087,  
31224, 31344, 31452, 31547, 31607, 31755, 31861, 31987, 32124, 32236, 32419, 32518, 32620,  
32780, 32906, 33032, 33182, 33297, 33423, 33535, 33669, 33789, 34010, 34133, 34264, 34377,  
34514, 34635, 34747, 34891, 35010, 35254, 35499, 35690  
,27885, 28076, 28321, 28560, 28684, 28823, 28935, 29056, 29198, 29311, 29437, 29560, 29771,  
29890, 30020, 30123, 30248, 30362, 30514, 30634, 30763, 30922, 31017, 31120, 31305, 31427,  
31564, 31684, 31792, 31887, 31947, 32095, 32201, 32327, 32464, 32576, 32759, 32858, 32960,  
33120, 33246, 33372, 33522, 33637, 33763, 33875, 34009, 34129, 34350, 34473, 34604, 34717,  
34854, 34975, 35087, 35231, 35350, 35594, 35839, 36030  
,28225, 28416, 28661, 28900, 29024, 29163, 29275, 29396, 29538, 29651, 29777, 29900, 30111,  
30230, 30360, 30463, 30588, 30702, 30854, 30974, 31103, 31262, 31357, 31460, 31645, 31767,  
31904, 32024, 32132, 32227, 32287, 32435, 32541, 32667, 32804, 32916, 33099, 33198, 33300,  
33460, 33586, 33712, 33862, 33977, 34103, 34215, 34349, 34469, 34690, 34813, 34944, 35057,  
35194, 35315, 35427, 35571, 35690, 35934, 36179, 36370  
,28565, 28756, 29001, 29240, 29364, 29503, 29615, 29736, 29878, 29991, 30117, 30240, 30451,  
30570, 30700, 30803, 30928, 31042, 31194, 31314, 31443, 31602, 31697, 31800, 31985, 32107,  
32244, 32364, 32472, 32567, 32627, 32775, 32881, 33007, 33144, 33256, 33439, 33538, 33640,

33800, 33926, 34052, 34202, 34317, 34443, 34555, 34689, 34809, 35030, 35153, 35284, 35397, 35534, 35655, 35767, 35911, 36030, 36274, 36519, 36710  
,28905, 29096, 29341, 29580, 29704, 29843, 29955, 30076, 30218, 30331, 30457, 30580, 30791, 30910, 31040, 31143, 31268, 31382, 31534, 31654, 31783, 31942, 32037, 32140, 32325, 32447, 32584, 32704, 32812, 32907, 32967, 33115, 33221, 33347, 33484, 33596, 33779, 33878, 33980, 34140, 34266, 34392, 34542, 34657, 34783, 34895, 35029, 35149, 35370, 35493, 35624, 35737, 35874, 35995, 36107, 36251, 36370, 36614, 36859, 37050  
,29245, 29436, 29681, 29920, 30044, 30183, 30295, 30416, 30558, 30671, 30797, 30920, 31131, 31250, 31380, 31483, 31608, 31722, 31874, 31994, 32123, 32282, 32377, 32480, 32665, 32787, 32924, 33044, 33152, 33247, 33307, 33455, 33561, 33687, 33824, 33936, 34119, 34218, 34320, 34480, 34606, 34732, 34882, 34997, 35123, 35235, 35369, 35489, 35710, 35833, 35964, 36077, 36214, 36335, 36447, 36591, 36710, 36954, 37199, 37390  
,29585, 29776, 30021, 30260, 30384, 30523, 30635, 30756, 30898, 31011, 31137, 31260, 31471, 31590, 31720, 31823, 31948, 32062, 32214, 32334, 32463, 32622, 32717, 32820, 33005, 33127, 33264, 33384, 33492, 33587, 33647, 33795, 33901, 34027, 34164, 34276, 34459, 34558, 34660, 34820, 34946, 35072, 35222, 35337, 35463, 35575, 35709, 35829, 36050, 36173, 36304, 36417, 36554, 36675, 36787, 36931, 37050, 37294, 37539, 37730  
,29925, 30116, 30361, 30600, 30724, 30863, 30975, 31096, 31238, 31351, 31477, 31600, 31811, 31930, 32060, 32163, 32288, 32402, 32554, 32674, 32803, 32962, 33057, 33160, 33345, 33467, 33604, 33724, 33832, 33927, 33987, 34135, 34241, 34367, 34504, 34616, 34799, 34898, 35000, 35160, 35286, 35412, 35562, 35677, 35803, 35915, 36049, 36169, 36390, 36513, 36644, 36757, 36894, 37015, 37127, 37271, 37390, 37634, 37879, 38070  
,30265, 30456, 30701, 30940, 31064, 31203, 31315, 31436, 31578, 31691, 31817, 31940, 32151, 32270, 32400, 32503, 32628, 32742, 32894, 33014, 33143, 33302, 33397, 33500, 33685, 33807, 33944, 34064, 34172, 34267, 34327, 34475, 34581, 34707, 34844, 34956, 35139, 35238, 35340, 35500, 35626, 35752, 35902, 36017, 36143, 36255, 36389, 36509, 36730, 36853, 36984, 37097, 37234, 37355, 37467, 37611, 37730, 37974, 38219, 38410

],

[25200,25391,25636,25880,25999,26143,26255,26376,26513,26626,26757,26880,27081,27200, 27335,27443,27558,27672,27824,27949,28073,28237,28342,28440,28630,28742,28879,29004,2 9107,29227,29287,29410,29521,29642,29779,29896,30079,30178,30275,30430,30561,30682,30 832,30947,31083,31190,31319,31459,31670,31793,31919,32032,32174,32295,32407,32546,326 70,32909,33154,33345  
,25540, 25731, 25976, 26220, 26339, 26483, 26595, 26716, 26853, 26966, 27097, 27220, 27421, 27540, 27675, 27783, 27898, 28012, 28164, 28289, 28413, 28577, 28682, 28780, 28970, 29082, 29219, 29344, 29447, 29567, 29627, 29750, 29861, 29982, 30119, 30236, 30419, 30518, 30615, 30770, 30901, 31022, 31172, 31287, 31423, 31530, 31659, 31799, 32010, 32133, 32259, 32372, 32514, 32635, 32747, 32886, 33010, 33249, 33494, 33685  
,25880, 26071, 26316, 26560, 26679, 26823, 26935, 27056, 27193, 27306, 27437, 27560, 27761, 27880, 28015, 28123, 28238, 28352, 28504, 28629, 28753, 28917, 29022, 29120, 29310, 29422, 29559, 29684, 29787, 29907, 29967, 30090, 30201, 30322, 30459, 30576, 30759, 30858, 30955, 31110, 31241, 31362, 31512, 31627, 31763, 31870, 31999, 32139, 32350, 32473, 32599, 32712,



32854, 32975, 33087, 33226, 33350, 33589, 33834, 34025  
,26220, 26411, 26656, 26900, 27019, 27163, 27275, 27396, 27533, 27646, 27777, 27900, 28101,  
28220, 28355, 28463, 28578, 28692, 28844, 28969, 29093, 29257, 29362, 29460, 29650, 29762,  
29899, 30024, 30127, 30247, 30307, 30430, 30541, 30662, 30799, 30916, 31099, 31198, 31295,  
31450, 31581, 31702, 31852, 31967, 32103, 32210, 32339, 32479, 32690, 32813, 32939, 33052,  
33194, 33315, 33427, 33566, 33690, 33929, 34174, 34365  
,26560, 26751, 26996, 27240, 27359, 27503, 27615, 27736, 27873, 27986, 28117, 28240, 28441,  
28560, 28695, 28803, 28918, 29032, 29184, 29309, 29433, 29597, 29702, 29800, 29990, 30102,  
30239, 30364, 30467, 30587, 30647, 30770, 30881, 31002, 31139, 31256, 31439, 31538, 31635,  
31790, 31921, 32042, 32192, 32307, 32443, 32550, 32679, 32819, 33030, 33153, 33279, 33392,  
33534, 33655, 33767, 33906, 34030, 34269, 34514, 34705  
,26900, 27091, 27336, 27580, 27699, 27843, 27955, 28076, 28213, 28326, 28457, 28580, 28781,  
28900, 29035, 29143, 29258, 29372, 29524, 29649, 29773, 29937, 30042, 30140, 30330, 30442,  
30579, 30704, 30807, 30927, 30987, 31110, 31221, 31342, 31479, 31596, 31779, 31878, 31975,  
32130, 32261, 32382, 32532, 32647, 32783, 32890, 33019, 33159, 33370, 33493, 33619, 33732,  
33874, 33995, 34107, 34246, 34370, 34609, 34854, 35045  
,27240, 27431, 27676, 27920, 28039, 28183, 28295, 28416, 28553, 28666, 28797, 28920, 29121,  
29240, 29375, 29483, 29598, 29712, 29864, 29989, 30113, 30277, 30382, 30480, 30670, 30782,  
30919, 31044, 31147, 31267, 31327, 31450, 31561, 31682, 31819, 31936, 32119, 32218, 32315,  
32470, 32601, 32722, 32872, 32987, 33123, 33230, 33359, 33499, 33710, 33833, 33959, 34072,  
34214, 34335, 34447, 34586, 34710, 34949, 35194, 35385  
,27580, 27771, 28016, 28260, 28379, 28523, 28635, 28756, 28893, 29006, 29137, 29260, 29461,  
29580, 29715, 29823, 29938, 30052, 30204, 30329, 30453, 30617, 30722, 30820, 31010, 31122,  
31259, 31384, 31487, 31607, 31667, 31790, 31901, 32022, 32159, 32276, 32459, 32558, 32655,  
32810, 32941, 33062, 33212, 33327, 33463, 33570, 33699, 33839, 34050, 34173, 34299, 34412,  
34554, 34675, 34787, 34926, 35050, 35289, 35534, 35725  
,27920, 28111, 28356, 28600, 28719, 28863, 28975, 29096, 29233, 29346, 29477, 29600, 29801,  
29920, 30055, 30163, 30278, 30392, 30544, 30669, 30793, 30957, 31062, 31160, 31350, 31462,  
31599, 31724, 31827, 31947, 32007, 32130, 32241, 32362, 32499, 32616, 32799, 32898, 32995,  
33150, 33281, 33402, 33552, 33667, 33803, 33910, 34039, 34179, 34390, 34513, 34639, 34752,  
34894, 35015, 35127, 35266, 35390, 35629, 35874, 36065  
,28260, 28451, 28696, 28940, 29059, 29203, 29315, 29436, 29573, 29686, 29817, 29940, 30141,  
30260, 30395, 30503, 30618, 30732, 30884, 31009, 31133, 31297, 31402, 31500, 31690, 31802,  
31939, 32064, 32167, 32287, 32347, 32470, 32581, 32702, 32839, 32956, 33139, 33238, 33335,  
33490, 33621, 33742, 33892, 34007, 34143, 34250, 34379, 34519, 34730, 34853, 34979, 35092,  
35234, 35355, 35467, 35606, 35730, 35969, 36214, 36405  
,28600, 28791, 29036, 29280, 29399, 29543, 29655, 29776, 29913, 30026, 30157, 30280, 30481,  
30600, 30735, 30843, 30958, 31072, 31224, 31349, 31473, 31637, 31742, 31840, 32030, 32142,  
32279, 32404, 32507, 32627, 32687, 32810, 32921, 33042, 33179, 33296, 33479, 33578, 33675,  
33830, 33961, 34082, 34232, 34347, 34483, 34590, 34719, 34859, 35070, 35193, 35319, 35432,  
35574, 35695, 35807, 35946, 36070, 36309, 36554, 36745  
,28940, 29131, 29376, 29620, 29739, 29883, 29995, 30116, 30253, 30366, 30497, 30620, 30821,  
30940, 31075, 31183, 31298, 31412, 31564, 31689, 31813, 31977, 32082, 32180, 32370, 32482,  
32619, 32744, 32847, 32967, 33027, 33150, 33261, 33382, 33519, 33636, 33819, 33918, 34015,

34170, 34301, 34422, 34572, 34687, 34823, 34930, 35059, 35199, 35410, 35533, 35659, 35772, 35914, 36035, 36147, 36286, 36410, 36649, 36894, 37085  
,29280, 29471, 29716, 29960, 30079, 30223, 30335, 30456, 30593, 30706, 30837, 30960, 31161, 31280, 31415, 31523, 31638, 31752, 31904, 32029, 32153, 32317, 32422, 32520, 32710, 32822, 32959, 33084, 33187, 33307, 33367, 33490, 33601, 33722, 33859, 33976, 34159, 34258, 34355, 34510, 34641, 34762, 34912, 35027, 35163, 35270, 35399, 35539, 35750, 35873, 35999, 36112, 36254, 36375, 36487, 36626, 36750, 36989, 37234, 37425  
,29620, 29811, 30056, 30300, 30419, 30563, 30675, 30796, 30933, 31046, 31177, 31300, 31501, 31620, 31755, 31863, 31978, 32092, 32244, 32369, 32493, 32657, 32762, 32860, 33050, 33162, 33299, 33424, 33527, 33647, 33707, 33830, 33941, 34062, 34199, 34316, 34499, 34598, 34695, 34850, 34981, 35102, 35252, 35367, 35503, 35610, 35739, 35879, 36090, 36213, 36339, 36452, 36594, 36715, 36827, 36966, 37090, 37329, 37574, 37765  
,29960, 30151, 30396, 30640, 30759, 30903, 31015, 31136, 31273, 31386, 31517, 31640, 31841, 31960, 32095, 32203, 32318, 32432, 32584, 32709, 32833, 32997, 33102, 33200, 33390, 33502, 33639, 33764, 33867, 33987, 34047, 34170, 34281, 34402, 34539, 34656, 34839, 34938, 35035, 35190, 35321, 35442, 35592, 35707, 35843, 35950, 36079, 36219, 36430, 36553, 36679, 36792, 36934, 37055, 37167, 37306, 37430, 37669, 37914, 38105  
,30300, 30491, 30736, 30980, 31099, 31243, 31355, 31476, 31613, 31726, 31857, 31980, 32181, 32300, 32435, 32543, 32658, 32772, 32924, 33049, 33173, 33337, 33442, 33540, 33730, 33842, 33979, 34104, 34207, 34327, 34387, 34510, 34621, 34742, 34879, 34996, 35179, 35278, 35375, 35530, 35661, 35782, 35932, 36047, 36183, 36290, 36419, 36559, 36770, 36893, 37019, 37132, 37274, 37395, 37507, 37646, 37770, 38009, 38254, 38445

]

])
